# Supplementary material
Source: Springer Nature journal article supplement (https://www.springermedizin.de/resource/supplementary/12879_2013_2638_MOESM5_ESM.pdf/9445020)

**(a)**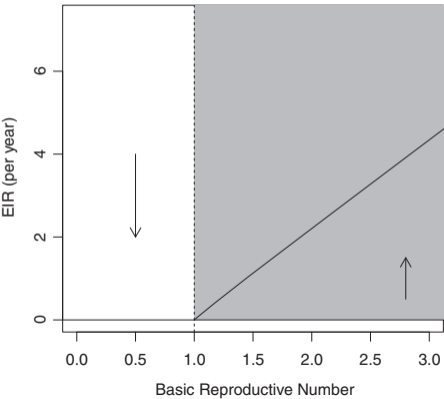**(b)**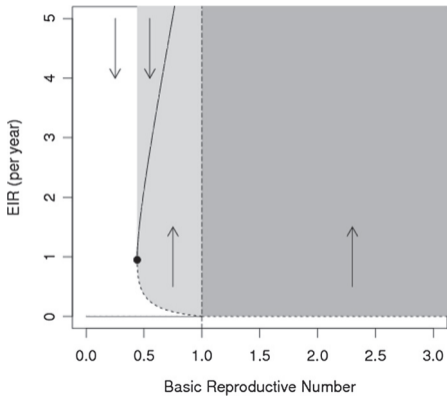

Supplement: MOESM5 [file 9445020]
